# Supplementary material for: A highly selective chromo- and fluorogenic dual responding fluoride sensor: naked-eye detection of F? ion in natural water via a test paper
Source: Royal Society of Chemistry journal article supplement (doi:10.1039/b601282e), 2006-01-01
Supplement: b601282e.pdf [file b601282e.pdf]

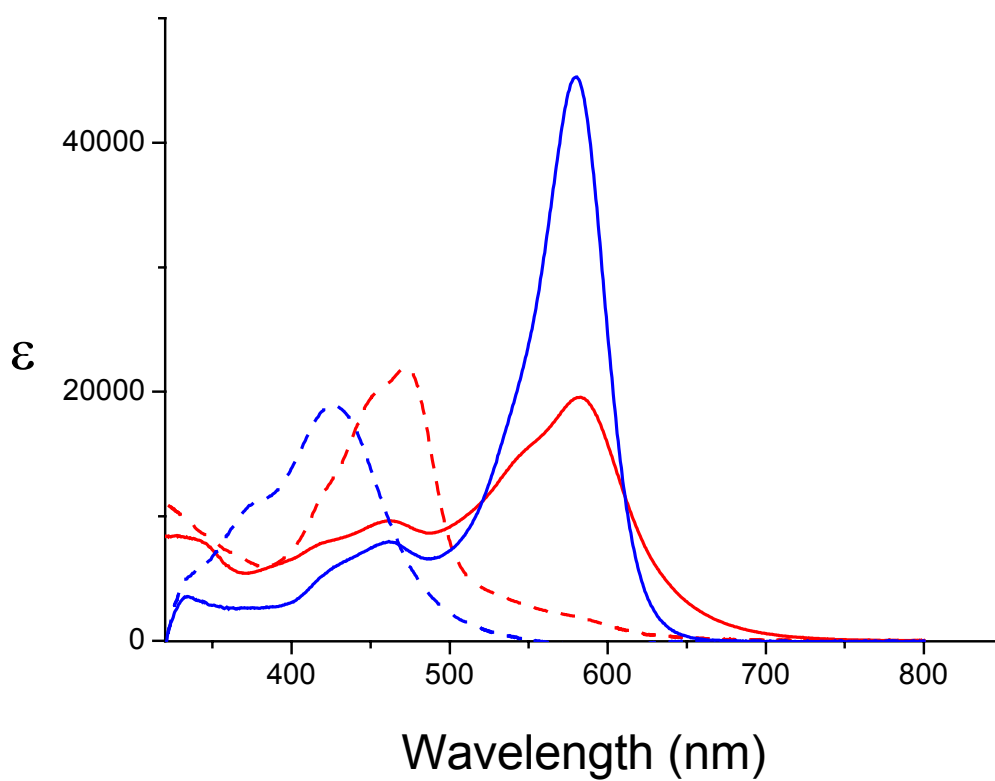

**Figure S1** Uv-vis spectra of **1** (in present of 1 eq. TS) (blue, solid) and **1'** (red, solid) and upon addition of 2 folds of  $\text{F}^-$  (dash) in  $\text{CH}_3\text{CN}$ .

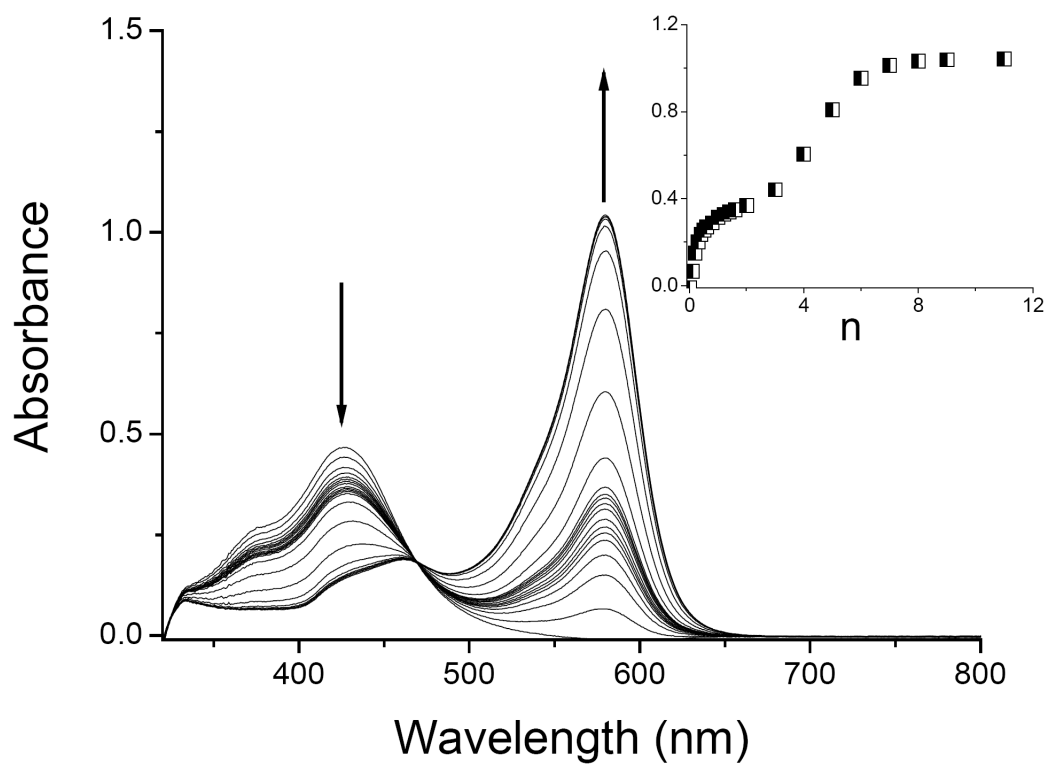

**Figure S2** Titration of a  $1.0 \times 10^{-5}$  M solution of **1** in presence of  $1.0 \times 10^{-5}$  M of P-Toluene sulfonic acid in acetonitrile with a standard solution of  $\text{H}_2\text{PO}_4^-$ . Inset: absorbance at 580nm versus number of equivalents of  $\text{H}_2\text{PO}_4^-$  ion (n) added.

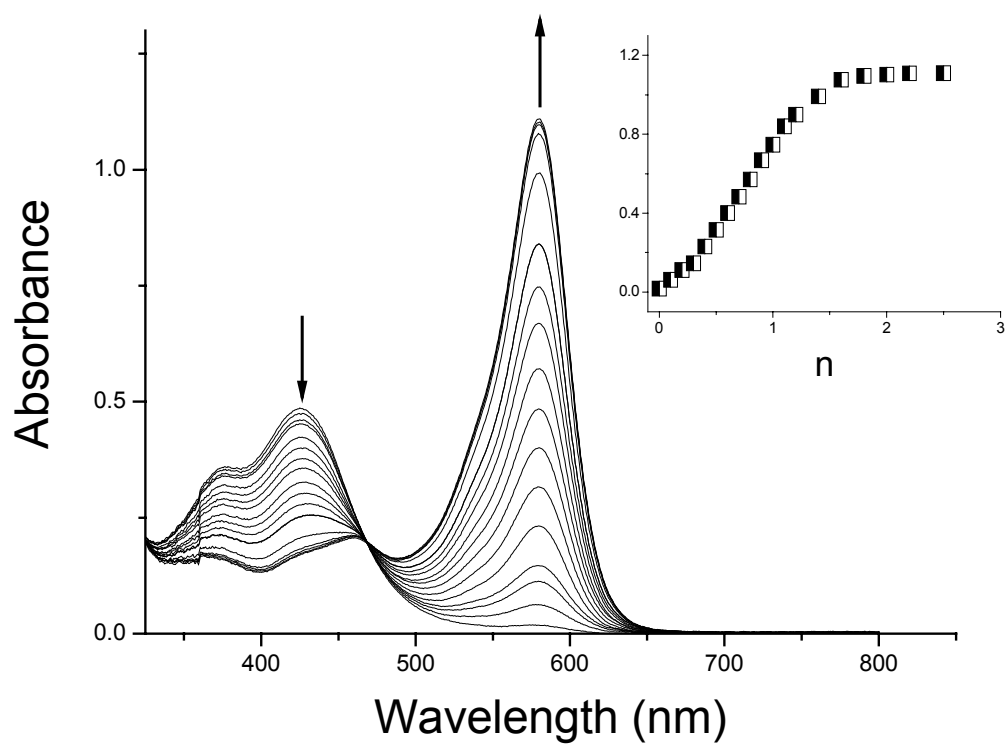

**Figure S3** Titration of a  $1.0 \times 10^{-5}$  M solution of **1** in presence of  $1.0 \times 10^{-5}$  M of TS in acetonitrile with a standard solution of OH<sup>-</sup>. Inset: absorbance at 580nm versus number of equivalents of OH<sup>-</sup> ion (n) added.

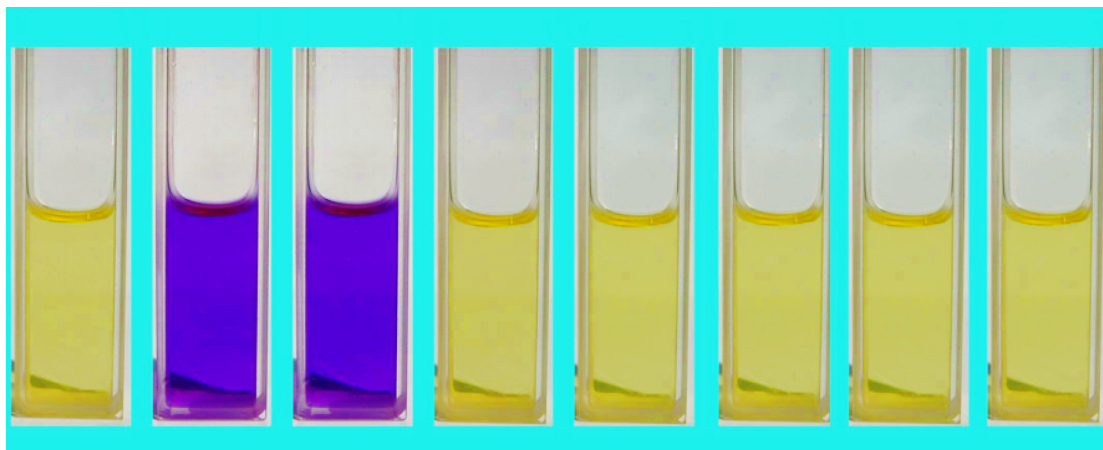

**Figure S4** Color changes observed of free ligand HL in DMSO ( $5 \times 10^{-5}$  M) in the presence of 1 equivalent molar ratio of TS upon addition anions as TBA salts. From left to right: no anions, 1 equivalent molar of  $F^-$ , 1 equivalent molar of  $H_2PO_4^-$ , and 20 equivalent molar of  $Cl^-$ ,  $Br^-$ ,  $I^-$ ,  $HSO_4^-$ ,  $NO_3^-$ .

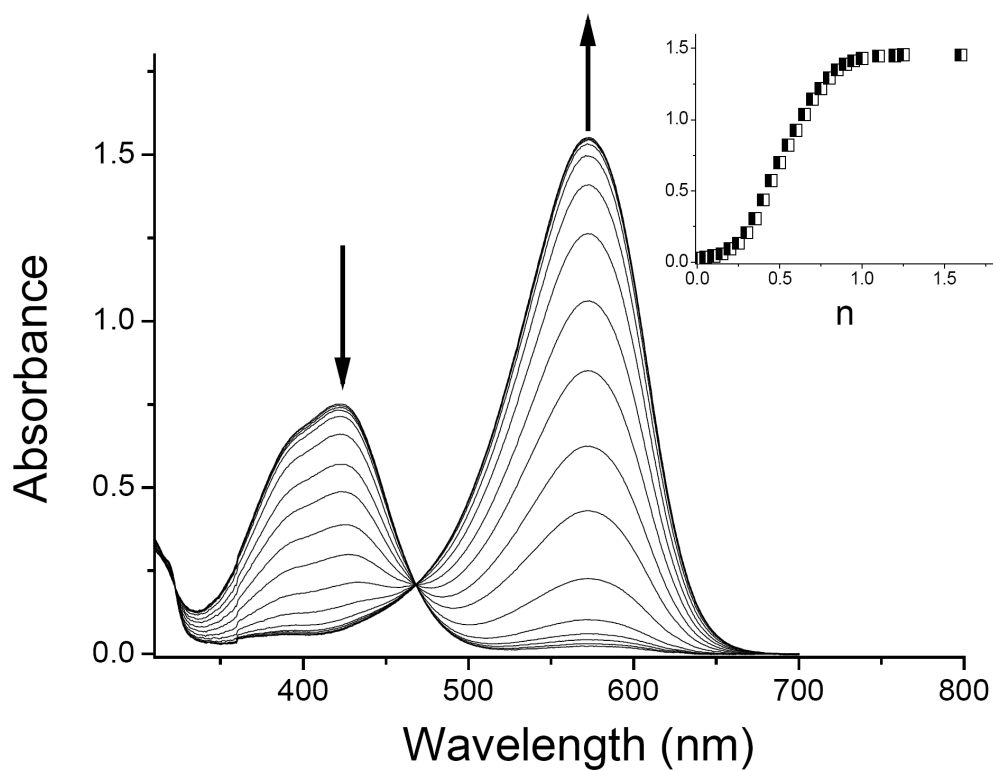

**Figure S5** Titration of a  $1.0 \times 10^{-5}$  M solution of 1 in presence of  $1.0 \times 10^{-5}$  M of TS in DMSO with a standard solution of  $\text{H}_2\text{PO}_4^-$ . Inset: absorbance at 580nm versus number of equivalents of  $\text{H}_2\text{PO}_4^-$  ions (n) added.
